1 **Title:** Frequency-dependent Maternal Effects across Species and Environments

2

3 **Key-words:** annual plants, competition, frequency dependence, maternal provisioning, seed  
4 mass, soil moisture

5 **Running title:** *Maternal effects and plant competition*

6 **Manuscript type:** Research article

7 **Manuscript elements:** Abstract [207], Introduction [949], Methods [1304], Results [508],  
8 Discussion [1556], Figures [3], Supporting Information

9

10 **Authors:** Rachel M. Germain<sup>1</sup>, Tess N. Grainger<sup>2</sup>, Natalie T. Jones<sup>3</sup>, and Benjamin Gilbert<sup>2</sup>

11

12 **Affiliations:**

13 <sup>1</sup>*Corresponding author:* Rachel M. Germain [email: rgermain@zoology.ubc.ca, phone: 647-884-  
14 4312, address: Dept. Botany & Dept. of Zoology, University of British Columbia, Vancouver,  
15 BC, CA

16 <sup>2</sup>Dept. Ecology and Evolutionary Biology, University of Toronto, Toronto, ON, CA

17 <sup>3</sup>Dept. Biological Sciences, University of California – San Diego, San Diego, CA, USA

18

19

20

21

22

23

24

## 25 **Summary**

- 26 1. Maternal provisioning of offspring in response to environmental conditions (“maternal  
27 environmental effects”) has been argued as ‘the missing link’ in plant life histories. Although  
28 empirical evidence suggests that maternal responses to abiotic conditions are common, there  
29 is little understanding of the prevalence of maternal provisioning in competitive  
30 environments.
- 31 2. We tested how competition in two soil moisture environments affects maternal provisioning of  
32 offspring seed mass. Specifically, we varied conspecific frequency from 90% (intraspecific  
33 competition) to 10% (interspecific competition) for 15 pairs of annual plant species that occur  
34 in California.
- 35 3. We found that conspecific frequency affected maternal provisioning (seed mass) in 48% of  
36 species, and that these responses included both increased (20%) and decreased (24%) seed  
37 mass. In contrast, 68% of species responded to competition through changes in per capita  
38 fecundity (seed number), which generally decreased as conspecific frequency increased. The  
39 direction and magnitude of frequency-dependent seed mass depended on the identity of the  
40 competitor, even among species in which fecundity was not affected by competitor identity.
- 41 4. *Synthesis*. Our research demonstrates how species responses to different competitive  
42 environments manifest through maternal provisioning, and that these responses alter previous  
43 estimates of environmental maternal effects and reproductive output; future study is needed to  
44 understand their combined effects on population and community dynamics.

45

46

47

48

49 **Introduction**

50 The amount of resources available to individual offspring at the propagule stage (seeds or  
51 eggs) is maternally controlled, and depends on the mother's provisioning strategy and resource  
52 environment. Changes in propagule size in response to maternal environmental conditions have  
53 been shown to have cascading effects on offspring life histories (Segers & Taborsky 2010; Allen  
54 2012) and components of fitness (e.g., germination, dormancy, survival, and reproduction;  
55 Westoby *et al.* 1996; Gomez 2004)—a phenomenon known as 'maternal environmental effects'  
56 and referred to simply as 'maternal effects' for brevity henceforth, though other forms exist  
57 (Roach & Wulff 1987; Galloway *et al.* 2009). Maternal effects that increase propagule size come  
58 at the expense of offspring number (offspring size-number tradeoffs, Charnov & Ernest 2006),  
59 but in certain environments, mothers that produce few large offspring can have higher fitness  
60 than those that produce many small offspring (Allen, Buckley & Marshall 2008). Because of  
61 their clear consequences for offspring fitness in many species, maternal effects have been  
62 referred to as 'the missing link' between parent and offspring life histories (Donohue 2009), and  
63 have remained of interest to evolutionary biologists seeking to understand selection and  
64 adaptation for over 50 years (Roach & Wulff 1987; Mousseau & Fox 1998).

65 The diversity of species-specific maternal effects observed in evolutionary studies  
66 (Herman & Sultan 2011) implicates the importance of maternal effects for ecological dynamics,  
67 such as population persistence and competition. Indeed, the maternal environment can have large  
68 effects on trait means and the fitness of whole cohorts of individuals in a population (*i.e.*,  
69 population growth rates; Galloway & Etterson 2007) that act additively or interactively with  
70 offspring environmental conditions (Uller, Nakagawa & English 2013). Because traits and  
71 population growth rates mediate how species interact with each other and their environments,

72 maternal effects might act as temporal dimensions to species' niches that, in addition to  
73 responses to current environmental conditions (e.g., Levine & Rees 2004), alter coexistence  
74 outcomes; this phenomenon has been demonstrated experimentally in the related field of  
75 'carryover effects' of early-life conditions (Van Allen & Rudolf 2015). However, predictions for  
76 how maternal effects might influence ecological dynamics cannot be made using existing data  
77 from single species experiments because they exclude species interactions, such as competition,  
78 that are important to species persistence in multi-species communities (VanAllen & Rudolf  
79 2016).

80 In competitive environments, maternal effects on offspring provisioning may manifest in  
81 response to the relative frequencies of conspecific to heterospecific competitors, even when total  
82 density is maintained (Law & Watkinson 1987). In ecological studies, frequency-dependent  
83 demographic rates are used to infer the relative strength of competitive interactions within and  
84 among species (Levine & HilleRisLambers 2009). Although seeds have been shown to decrease  
85 in size in response to increasing plant density (Larios & Venable 2015), tests of maternal effects  
86 in response to impacts of different competitive neighborhoods are lacking. Tests that incorporate  
87 frequency-dependent effects are particularly relevant, as parallel tests on fecundity are central to  
88 understanding species coexistence (Levine & HilleRisLambers 2009) and may be reinforced or  
89 counteracted by maternal effects (Germain & Gilbert 2014). Without knowledge of maternal  
90 provisioning responses to different competitive neighborhoods, population and community  
91 ecologists cannot build intergenerational effects into a broader understanding of population and  
92 community dynamics.

93 Most studies of maternal effects in response to abiotic conditions are conducted in low-  
94 competition environments (e.g., Germain & Gilbert 2014) even though organisms rarely occur in

95 the absence of biotic interactors in nature. However, competition might interact with the abiotic  
96 environment to affect seed size if competitive interactions alter resource availability or a species'  
97 response to abiotic conditions. For example, competitors may exacerbate maternal effects that  
98 are driven by a limiting resource (Stratton 1989), such as soil moisture (Fotelli *et al.* 2001). As a  
99 result, current estimates of the prevalence of maternal effects are likely conservative. Species  
100 responses to the abiotic environment, conspecific competitors, and heterospecific competitors are  
101 necessary components of competition models; predicting the influence of maternal effects on  
102 ecological dynamics requires an understanding of how the maternal environment modifies each  
103 response.

104         We test the effects of competition and soil moisture on maternal seed provisioning using  
105 25 annual plant species that occur in the mediterranean-climate regions of the California Floristic  
106 Province. The California Floristic Province is characterized by high inter-annual rainfall  
107 variability, which determines plant community composition, productivity, and the nature of  
108 competitive interactions (Levine, McEachern & Cowan 2011). In variable environments,  
109 selection favors plastic responses, such as maternal environmental effects, that offset variability  
110 in fitness (Dey, Proulx & Teotónio 2016). The seed stage is important to the life cycle of an  
111 annual plant because annual plant populations regenerate entirely each year from the seed bank.  
112 Increased seed mass generally provides early growth advantages, allowing individuals to  
113 establish prior to the onset of unpredictable hazards, such as drought (Kidson & Westoby 2000),  
114 as well as increased competitive ability in productive years (Susko & Cavers 2008).

115         We competed fifteen pairs of species at six relative frequencies and in two soil moisture  
116 environments that simulate wet and dry years. We then quantified the mass and number of seeds  
117 produced, and used those data to address three questions: (i) How commonly does maternal

118 provisioning respond to conspecific frequency (i.e., changes in interspecific vs. intraspecific  
119 frequency) and how does it compare to seed number responses? (ii) Is maternal provisioning in  
120 response to abiotic conditions sensitive to the competitive environment? And (iii) does  
121 competitor identity alter the strength and direction of frequency-dependent maternal  
122 provisioning? In a previous experiment, we found that ~20% of the same species considered here  
123 exhibit maternal effects on seed mass in response to soil moisture conditions in the absence of  
124 competition (Germain & Gilbert 2014); we use this earlier study to compare maternal effects in  
125 non-competitive and competitive environments.

126

127

## Materials and methods

128

### STUDY SPECIES

129

130

131

132

133

134

135

136

137

138

139

140

To test species responses to competition, we examined maternal effects on seed mass among 15 pairs of annual plant species (25 species total, Table S1) that were competed as part of a previous study (Germain, Weir & Gilbert 2016); species pairs were selected to meet two criteria. First, the 25 species spanned a broad taxonomic range (six angiosperm Orders represented; Table S1), which allowed us to select pairs that represented a range of phylogenetic distances (nine to 170 million years since divergence; phylogeny in Fig. S1). Pairs were selected to represent phylogenetically independent contrasts (i.e., non-overlapping branch lengths), to circumvent phylogenetic pseudoreplication. Second, the selected species overlap in habitat preference (all associate with grassland meadow in mediterranean-type climates) and overlap geographically in California (CalFlora [<http://www.calflora.org>]); as such, they have the potential to compete in the wild. Additional details about species selection are in Supplementary Methods.

141 We initially sought a balanced design with 10 species competed twice to test how  
142 strongly maternal effects on seed mass were determined by the identity of the competitor,  
143 resulting in a total of 20 species pairs and 30 unique species. However, competition was intense  
144 enough among 5 species pairs that seeds were not produced and maternal effects could not be  
145 quantified, resulting in the design we present here with 15 species pairs and 25 unique species,  
146 with five species competed twice. Seeds were obtained from commercial suppliers and an  
147 individual donor, and were sourced from natural populations consisting of relatively few  
148 generations (most < 3, all < 20; Table S1) prior to our experiments. It is possible that the genetic  
149 diversity of our seed populations is low compared to natural populations, though we suspect that  
150 this is not the case given the large numbers of individuals used to establish the commercial  
151 populations and the small number of generations that have elapsed.

## 152 GREENHOUSE EXPERIMENT

153 From January to July 2012, we grew the 15 species pairs in competition in a greenhouse  
154 under two soil moisture levels (wet vs. dry); see Supplementary Methods for details on growing  
155 conditions. Plants in the wet treatment were watered twice as often as those in the dry treatment,  
156 with the total water received designed to mimic rainfall in mesic sites during wet and dry years  
157 (Germain & Gilbert 2014). The competitive environment was manipulated using a replacement  
158 design (Jolliffe 2000), in which seeds of each species pair were sown at six relative frequency  
159 ratios (10:60, 20:50, 30:40, 40:30, 50:20 and 60:10 expected germinants) at a common density of  
160 70 individuals. This density is comparable to the seeding density found in annual grasslands  
161 (2500 to 5500 plants m<sup>-2</sup> (Bartolome 1979)). To obtain a density of 70 individuals per pot, we  
162 tested each species' germination rate prior to the experiment and corrected seeding densities

163 based on these rates (i.e. a pot with 60 individuals of one species would receive 60 seeds of a  
164 species with 100% germination, or 120 seeds of a species with 50% germination).

165 For each species pair, we had two replicate pots per combination of soil moisture  
166 condition and frequency ratio, for a total of 360 pots of plants that were randomly assigned to a  
167 position in the greenhouse. All greenhouse growing conditions were chosen to simulate those  
168 typical of annual grassland in mediterranean-climate regions (Germain & Gilbert 2014;  
169 Supplementary Methods). We monitored pots daily and collected all seeds produced in each pot  
170 as they matured on the parent plants, pooling seed among individuals of the same species in each  
171 pot. At the end of the experiment, all seed material produced in each pot was weighed, and a  
172 random representative subsample was taken to estimate the average mass per seed and number of  
173 seeds produced per plant in a given pot (Supplementary Methods).

174 Concurrent to this experiment, an additional experiment using the same species was  
175 conducted to estimate the impact of soil moisture conditions on maternal provisioning (reported  
176 in Germain & Gilbert 2014). Key differences between the previous experiment and the  
177 experiment we present here are that each species was grown as singles-species monocultures at  
178 low densities (~seven individuals per pot, compared to 70 in the current experiment), meaning  
179 that competition was greatly relaxed. We include summary results from Germain and Gilbert  
180 (2014) in this paper to compare maternal effects on seed mass to soil moisture conditions in the  
181 presence and absence of competition.

## 182 STATISTICAL ANALYSES

183 Prior to analysis, we transformed the data in two ways to meet model assumptions and  
184 facilitate comparisons among species. First, we log transformed seed mass, seed number, and  
185 conspecific frequency to minimize heteroscedasticity and linearize seed mass and seed number



186 relationships with conspecific frequency. Second, to allow us to compare species that differ  
187 markedly in seed production, we standardized the log-transformed seed mass and seed number  
188 data for each species to a mean of zero and unit variance. For simplicity, we henceforth refer to  
189 the standardized log-transformed data as ‘seed mass’, ‘seed number’, and ‘frequency’, unless  
190 stated otherwise.

191 We conducted a cross-species analysis to test if species differed in their seed mass and  
192 seed number responses to the competitive and soil moisture environments. For these analyses,  
193 we used the ‘lmerTest’ R package to run linear mixed effects (LME) models, with either seed  
194 mass or seed number as response variables, and species (30 levels), soil moisture (two levels),  
195 conspecific frequency (six levels), and their interactions as fixed factors. Because species  
196 competing in a pot are not independent of one another, we included ‘Pot ID’ as a random factor  
197 in all models to control for the non-independence of species interacting in a single pot and avoid  
198 pseudoreplication (Bolker *et al.* 2009). The identity of the competitive pair (e.g., *Lasthenia*  
199 *glabrata* vs. *L. californica*) was also included as a random factor. Following significant species x  
200 frequency and species x soil moisture interactions (see Results), we ran species-specific analyses  
201 separately to identify species with significant responses to the biotic and abiotic environment. To  
202 accomplish this, we used linear models with type II sums of squares to test the effects of  
203 conspecific frequency, soil moisture conditions, and their interaction on seed mass and seed  
204 number. We used type II sum of squares as opposed to type III sum of squares because the latter  
205 prevents interpretation of main effects even in the absence of a significant interaction (Zuur *et al.*  
206 2009). In cases where the interaction was significant, we do not interpret the main effects (e.g.,  
207 triangle points in Fig. 1). The type of sum of squares used has no effect on the coefficient  
208 estimates.

209 We used major axis regression (MAR; R package ‘lmodel2’) to examine the relationships  
210 between response variables across species, and tested the significance of these relationships  
211 using a Pearson correlation. First, to identify if seed mass and seed number responses are  
212 correlated, we performed a MAR with the slopes of species’ seed mass responses and the slopes  
213 of species’ seed number responses as variables. Second, we tested whether the presence and  
214 absence of competition alters species’ responses to soil moisture conditions. To do this, we first  
215 calculated species’ average effect sizes of seed mass responses to contrasting soil conditions ( $\mu_{\text{dry}}$   
216  $- \mu_{\text{wet}}$ ) in the presence of competition (i.e. when grown at a density of 70 plants per pot) using  
217 Cohen’s *d* with pooled variance (Hartung, Knapp & Singha 2008); in cases where a species was  
218 used in more than one species pair, a single average effect size was used. We then used MAR to  
219 examine the relationship between these effect sizes and previously published, identically  
220 calculated effect sizes in the absence of competition (i.e. grow at a density of 7 species per pot;  
221 Germain & Gilbert 2014). Because these species are small-statured and occur at high densities in  
222 the field, we consider the contrast of 70 vs. 7 plants per plot as representative of a competition  
223 vs. no competition contrast.

## 224 Results

225 Of the 25 species included in this study to produce 15 reciprocal competition trials (see  
226 Materials and methods), 16 species showed significant ( $P < 0.05$ ) or marginally-significant ( $P <$   
227  $0.10$ ) maternal effects on seed mass when in competition (Fig. 1a, Fig. S2); we note that 2.5  
228 species are expected to show these results by chance alone given a 10% type 1 error rate. Most  
229 species responded to conspecific frequency alone (5 species) or in conjunction with the soil  
230 moisture environment in an additive (4 species) or multiplicative (3 species) manner; four  
231 species responded to the soil moisture environment but not conspecific frequency. The strength

232 and direction of responses varied among species, as indicated by significant species x frequency  
233 ( $F_{29,464} = 2.84$ ,  $P < 0.001$ ) and species x soil moisture ( $F_{29,410} = 3.19$ ,  $P < 0.001$ ) interactions in  
234 our cross-species statistical model (Table S2). Species were similarly likely to increase (5  
235 species) or decrease (6 species) seed mass as conspecific frequency increased (Table S2, Fig.  
236 1a). Overall, our results demonstrate that for this plant community, 64% of species are likely to  
237 exhibit maternal effects on seed mass when in competition, and that these responses vary by  
238 species with biotic or abiotic conditions.

239 In contrast to seed mass, 21 of the 25 species showed significant or marginally significant  
240 responses through seed number to conspecific frequency (7 species; Fig. 1b), soil moisture  
241 conditions (4 species), both additively (6 species), and both interactively (4 species; Table S2).  
242 Analogous to seed mass responses, the effect of conspecific frequency on seed number depended  
243 on the focal species (significant species x frequency interaction; Table S3,  $F_{29,716} = 6.63$ ,  $P <$   
244  $0.001$ ). However, in contrast to seed mass responses, frequency-dependent seed number was  
245 negative for most species (14 out of 17 species; Table S2), and was sensitive to the soil moisture  
246 environment (significant frequency x soil moisture interaction; Table S3,  $F_{1,716} = 4.49$ ,  $P =$   
247  $0.034$ ). These seed number responses were positively correlated with the strength and direction  
248 of species' seed mass responses ( $r = 0.28$ , slope = 0.48,  $P = 0.029$ ; Fig. 2a), even though some  
249 species showed opposite seed mass and seed number responses (grey regions of Fig. 2a).

250 The strength and direction of seed mass responses to contrasting soil moisture  
251 environments (wet vs. dry) in the presence of competition were positively correlated with those  
252 in the absence of competition ( $r = 0.50$ ,  $P = 0.010$ ; Fig. 2b). The slope of this correlation was  
253 less than one (major axis regression, slope = 0.67), as many species showed stronger responses to  
254 soil moisture when grown in the absence of competition (Fig. 2b). This result was surprising

255 given that, in the current experiment, 44% of species altered seed provisioning in response to soil  
256 moisture when in competition, whereas only 21% did so in the absence of competition (Germain  
257 & Gilbert 2014). This suggests that the prevalence but not the magnitude of soil moisture-  
258 induced maternal effects on seed mass increases in the presence of competition, possibly because  
259 the effects of soil moisture are dwarfed by those of conspecific frequency.

## 260 **Discussion**

261 There is a substantial body of empirical work investigating maternal effects in response  
262 to the abiotic environment (see review by Herman & Sultan 2011), yet responses to biotic  
263 interactions remain understudied, particularly in plants (Weiner *et al.* 1997; Larios & Venable  
264 2015). Our results show that changes to the competitive environment can alter maternal  
265 provisioning of seed mass and, much like more commonly measured seed number responses  
266 (Law & Watkinson 1987), that the strength and direction of maternal provisioning depend on  
267 identities of competing species. Below, we discuss how considering interactions between the  
268 biotic and abiotic environment allows us to understand how maternal effects are distributed  
269 across species in plant communities. Because species interactions frequently altered provisioning  
270 strategies, maternal effects likely have important implications for competitive dynamics, species  
271 coexistence and diversity; in this vein, we propose new hypotheses for future study.

272 We detected maternal effects on seed mass in response to the frequency of conspecific  
273 competitors in nearly half of the species examined, with negative and positive responses being  
274 equally common (Fig. 1a). There are two explanations for the maintenance of species-specific  
275 maternal effects that are not mutually exclusive and likely differ in importance among species.  
276 First, theory predicts that maternal provisioning strategies should evolve to maximize maternal  
277 fitness, either to the benefit or detriment of offspring fitness (Marshall & Uller 2007; Olofsson,

278 Ripa & Jonzen 2009). In that case, the most adaptive strategy will depend on the specific  
279 ecologies of focal species (e.g., Sultan, Barton & Wilczek 2009; Germain, Caruso & Maherali  
280 2013). Second, even if the same adaptive strategy is shared by two species, genetic or  
281 physiological constraints might result in the evolution of an adaptive or maladaptive strategy in  
282 one species but not the other (DeWitt, Sih & Wilson 1998). Though the degree to which species-  
283 specific maternal effects reflect evolutionary adaptation or constraint cannot be disentangled in  
284 our study, the ecological implications for offspring can be – larger seeds are more competitive  
285 and tolerant of environmental stress, whereas smaller seeds are more dispersive and likely to  
286 persist longer in the seedbank (Larios & Venable 2015; reviewed in Leishman *et al.* 2000). The  
287 life-history tradeoff between competitive ability and dispersal ability, as mediated by seed size,  
288 has been hypothesized to play a central role in determining coexistence outcomes (Westoby *et al.*  
289 1996; Jakobsson & Erikson 2000), and might explain the diversity of responses to conspecific  
290 frequency observed in our study.

291         Frequency-dependent seed mass responses were sensitive to the identity of the  
292 heterospecific competitor, rather than simply a common response to conspecific frequency. For  
293 example, the frequency-dependent seed mass of *Salvia columbariae* was significantly negative  
294 when competing with *S. viridis*, but was non-significant in competition with *Collinsia*  
295 *heterophylla*. A simple explanation for this result is that seed mass is sensitive to differences  
296 among species' competitive abilities, yet this mechanism is unlikely given the lack of frequency-  
297 dependent seed number responses to either competitor. The presence of seed mass responses in  
298 the absence of seed number responses is intriguing, because the latter would typically lead one to  
299 conclude that intraspecific and interspecific competition are equivalent (Harpole & Suding  
300 2007). Yet, if competitive interactions were equivalent, we would not expect to see frequency-

301 dependent seed mass responses. Seed mass responses appear to reveal competitive differences  
302 among species that are hidden when only seed number responses are considered – as in most  
303 ecological studies of plant competition. Previous research in plant monocultures demonstrates  
304 that parents produce smaller, more dispersive offspring when neighborhood densities are high  
305 (Larios & Venable 2014) – but in multi-species communities, this simple response likely also  
306 depends on the relative frequencies of heterospecific competitors.

307         An open question is whether maternal effects (seed mass responses) act to reinforce or  
308 counteract frequency-dependent demographic rates (seed number responses). Although our  
309 results suggest that seed mass responses to conspecific frequency generally act to reinforce seed  
310 number responses (i.e., they are positively correlated, Fig. 2a), some species clearly show  
311 opposite seed mass and seed number responses (points in the grey regions of Fig. 2a). In the  
312 context of demographic rates, the direction of frequency dependence can indicate whether  
313 competition is more likely to result in coexistence (negative frequency dependence) or exclusion  
314 (positive frequency dependence). In our experiment, negative frequency-dependent seed number  
315 responses were common among species (fig. 1b), but seed size responses were equally positive  
316 and negative (Fig. 1a). Previous research suggests that interspecific and intraspecific variation in  
317 seed mass alters several important biological parameters, from dormancy to growth and  
318 fecundity (Westoby *et al.* 1996; Eriksson 1999; Germain & Gilbert 2014). Thus, commonly-  
319 measured seed number responses (Harpole & Suding 2007) may be insufficient to capture the  
320 full impact of competitive interactions in the offspring generation (Ginzburg & Taneyhill 1994;  
321 Van Allen & Rudolf 2015). An intriguing avenue for future research are experiments that  
322 quantify how much variation in population dynamics is being missed without considering lagged  
323 responses to conditions of the maternal generation. An effect of the maternal environment on

324 population demography has been demonstrated previously in response to abiotic conditions (e.g.,  
325 understory light, Galloway & Etterson 2007), but is not yet understood in competitive  
326 environments.

327         We found important differences in the prevalence of maternal effects in response to soil  
328 moisture conditions in competitive and non-competitive environments. Specifically, over twice  
329 as many species altered seed provisioning in response to soil moisture in the presence of  
330 competition (44% of species; this study, Table S2) compared to in the absence of competition  
331 (21% of species; Germain & Gilbert 2014). Almost all tests of maternal effects have been  
332 conducted in non-competitive environments, with individuals grown alone (e.g., Aarssen &  
333 Burton 1990). Because most plants experience competition in their natural environments, current  
334 estimates of the prevalence of maternal effects may be conservative, and most relevant to  
335 disturbed environments where plant densities are low. Additionally, competition appears to  
336 dampen maternal effects in response to soil moisture (Fig. 2b) despite a threefold increase in the  
337 number of species that exhibit such an effect. This indicates that, contrary to our initial  
338 expectations, competition does not simply exacerbate maternal provisioning of seed mass in  
339 response to soil moisture, but instead appears to alter the nature of soil moisture's effects on seed  
340 mass in some species. This surprising result is likely due to the shift in maternal provisioning  
341 that occurs with a change in the identity of the competitor.

342         An intriguing hypothesis posed by Dyer *et al.* (2010) is that maternal effects might  
343 contribute to the invasion success of non-native species. Although our experiment was not  
344 specifically designed to test this hypothesis, six of the 25 species used in our trials are not native  
345 to California (Table S1), allowing qualitative comparisons. In doing so, we found that frequency-  
346 dependent maternal effects are significantly lower among non-native species compared to native

347 species (Fig. 3, Supplementary Methods). Our results suggest that for this system, maternal  
348 effects to the competitive environment may be one trait that differentiates native and non-native  
349 species and thus could contribute to invasion success. However, we caution that this result is  
350 based on limited and unbalanced data (only six non-native species), and could be explored with  
351 more species in future studies. For example, we do not have the power to test differences among  
352 non-native species that differ in impact, such as naturalized species vs. noxious invaders (Strauss  
353 *et al.* 2006; Diez *et al.* 2008), which could explain the considerable overlap in the range of  
354 responses among native and non-native species despite significant differences.

355         Although this study advances our understanding of the importance of competition in  
356 structuring maternal provisioning, there are two caveats that should be considered in interpreting  
357 our findings. First, we were unable to identify how changes in seed mass translate into  
358 differences in offspring performance, due to the logistical infeasibility of the full factorial  
359 experiment that would be required to test for longer-term impacts of seed mass. It is possible that  
360 maternal effects on seed mass may not persist beyond the seed stage, as some studies have found  
361 (e.g., Weiner *et al.* 1997). However, many studies demonstrate their effects on some aspect of  
362 post-seed performance, such as germination, dormancy, survival, growth, and fecundity (e.g.,  
363 Stanton 1984; Gomez 2004; Germain, Caruso & Maherali 2013; see review by Herman & Sultan  
364 2011), especially in competitive environments (Stratton 1989). Second, by focusing on seed  
365 mass responses, we likely underestimate the overall prevalence of maternal effects that can  
366 manifest in other ways, such as through germination or dormancy rates (Germain & Gilbert  
367 2014), or through epigenetic effects that can alter the offspring phenotype in more complex ways  
368 (Herman & Sultan 2011). As such, this study should be viewed as an important first step in





- 390 Allen, J.D. (2012) Effects of egg size reductions on development time and juvenile size in three  
391 species of echinoid echinoderms: Implications for life history theory. *Journal of*  
392 *Experimental Marine Biology and Ecology*, **422–423**, 72–80.
- 393 Allen, R.M., Buckley, Y.M. & Marshall, D.J. (2008) Offspring size plasticity in response to  
394 intraspecific competition: an adaptive maternal effect across life-history stages. *The*  
395 *American Naturalist*, **171**, 225–237.
- 396 Bartolome, J.W. (1979) Germination and seedling establishment in California annual grassland.  
397 *Journal of Ecology*, **67**, 273-281.
- 398 Bolker, B.M., Brooks, M.E., Clark, C.J., Geange, S.W., Poulsen, J.R., Stevens, M.H.H. & White,  
399 J.S. (2009) Generalized linear mixed models: a practical guide for ecology and evolution.  
400 *Trends in Ecology and Evolution*, **24**, 127-135.
- 401 Charnov, E. & Ernest, S.K.M. (2006) The offspring-size/clutch-size trade-off in mammals. *The*  
402 *American Naturalist*, **167**, 578–582.
- 403 DeWitt, T.J., Sih, A. & Wilson, D.S. (1998) Costs and limits of phenotypic plasticity. *Trends in*  
404 *Ecology & Evolution*, **13**, 77–81.
- 405 Dey, S., Proulx, S.R. & Teotónio, H. (2016) Adaptation to temporally fluctuating environments  
406 by the evolution of maternal effects. *PLOS Biology*, **14**, e1002388.
- 407 Diez, J.M., Sullivan, J.J., Hulme, P.E., Edwards, G. & Duncan, R.P. (2008) Darwin's  
408 naturalization conundrum: dissecting taxonomic patterns of species invasions. *Ecology*  
409 *Letters*, **11**, 674-681.

- 410 Donohue, K. (2009) Completing the cycle: maternal effects as the missing link in plant life  
411 histories. *Philosophical Transactions of the Royal Society B: Biological Sciences*, **364**,  
412 1059–1074.
- 413 Dyer, A.R., Brown, C.S., Espeland, E.K., McKay, J.K., Meimberg, H. & Rice, K.J. (2010) The  
414 role of adaptive trans-generational plasticity in biological invasions of plants. *Evolutionary*  
415 *Applications*, **3**, 179–192.
- 416 Eriksson, O. (1999) Seed size variation and its effect on germination and seedling performance  
417 in the clonal herb *Convallaria majalis*. *Acta Oecologica*, **20**, 61–66.
- 418 Fotelli, M.N., Gebler, A., Peuke, A.D. & Rennenberg, H. (2001). Drought affects the competitive  
419 interactions between *Fagus sylvatica* seedlings and an early successional species, *Rubus*  
420 *fruticosus*: responses of growth, water status and  $\delta^{13}\text{C}$  composition. *New Phytologist*, **151**,  
421 427-435.
- 422 Galloway, L.F. & Etterson, J.R. (2007) Transgenerational plasticity is adaptive in the wild.  
423 *Science*, **318**, 1134–1136.
- 424 Galloway, L.F., Etterson, J.R. & McGlothlin, J.W. (2009) Contribution of direct and maternal  
425 genetic effects to life-history evolution. *New Phytologist*, **183**, 826–838.
- 426 Germain, R.M. & Gilbert, B. (2014) Hidden responses to environmental variation: maternal  
427 effects reveal species niche dimensions. *Ecology Letters*, **17**, 662–669.

- 428 Germain, R.M., Caruso, C.M. & Maherali, H. (2013) Mechanisms and consequences of water  
429 stress-induced parental effects in an invasive annual grass. *International Journal of Plant*  
430 *Sciences*, **174**, 886–895.
- 431 Germain, R.M., Weir, J.T. & Gilbert, B. (2016) Species coexistence: macroevolutionary patterns  
432 and the contingency of historical interactions. *Proceedings of the Royal Society: B*, **283**,  
433 20160047
- 434 Ginzburg, L.R. & Taneyhill, D.E. (1994) Population cycles of forest Lepidoptera: a maternal  
435 effect hypothesis. *Journal of Animal Ecology*, **63**, 79-92.
- 436 Gomez, J.M. (2004) Bigger is not always better: conflicting selective pressures on seed size in  
437 *Quercus ilex*. *Evolution*, **58**, 71-80.
- 438 Harpole, W.S. & Suding, K.N. (2007) Frequency-dependence stabilizes competitive interactions  
439 among four annual plants. *Ecology Letters*, **10**, 1164–1169.
- 440 Hartung, J., Knapp, G. & Sinha, B.K. (2008) *Statistical Meta-Analysis with Applications*. John  
441 Wiley & Sons, Inc.
- 442 Herman, J.J. & Sultan, S.E. (2011) Adaptive transgenerational plasticity in plants: case studies,  
443 mechanisms, and implications for natural populations. *Frontiers in Plant Science*, **2**, 1-10.
- 444 Jakobsson, A. & Eriksson, O. (2000) A comparative study of seed number, seed size, seedling  
445 size and recruitment in grassland plants. *Oikos*, **88**, 494–502.
- 446 Jolliffe, P.A. (2000) The replacement series. *Journal of Ecology*, **88**, 371–385.

- 447 Kidson, R. & Westoby, M. (2000) Seed mass and seedling dimensions in relation to seedling  
448 establishment. *Oecologia*, **125**, 11–17.
- 449 Larios, E. & Venable, D.L. (2015) Maternal adjustment of offspring provisioning and the  
450 consequences for dispersal. *Ecology*, **96**, 2771–2780.
- 451 Law, R. & Watkinson, A.R. (1987) Response-surface analysis of two-species competition: an  
452 experiment on *Phleum arenarium* and *Vulpia fasciculata*. *The Journal of Ecology*, **75**, 871-  
453 886.
- 454 Leishman, M.R., Wright, I.J., Moles, A.T. & Westoby, M. The evolutionary ecology of seed  
455 size. *Seeds: The Ecology of Regeneration in Plant Communities*, pp. 31–57. CAB  
456 International.
- 457 Levine, J.M. & HilleRisLambers, J. (2009) The importance of niches for the maintenance of  
458 species diversity. *Nature*, **461**, 254–257.
- 459 Levine, J.M. & Rees, M. (2004) Effects of temporal variability on rare plant persistence in  
460 annual systems. *The American Naturalist*, **164**, 350–363.
- 461 Levine, J.M., McEachern, A.K. & Cowan, C. (2011) Seasonal timing of first rain storms affects  
462 rare plant population dynamics. *Ecology*, **92**, 2236–2247.
- 463 Marshall, D.J. & Uller, T. (2007) When is a maternal effect adaptive? *Oikos*, **116**, 1957–1963.
- 464 Mousseau, T.A. & Fox C.W. (1998) Maternal effects as adaptations. *The Quarterly Review of*  
465 *Biology*, **74**, 468–469.

- 466 Olofsson, H., Ripa, J. & Jonzen, N. (2009) Bet-hedging as an evolutionary game: the trade-off  
467 between egg size and number. *Proceedings of the Royal Society B: Biological Sciences*,  
468 **276**, 2963–2969.
- 469 Roach, D. & Wulff, R. (1987) Maternal effects in plants. *Annual Review of Ecology and*  
470 *Systematics*, **18**, 209–235.
- 471 Segers, F.H.I.D. & Taborsky, B. (2010) Egg size and food abundance interactively affect  
472 juvenile growth and behaviour. *Functional Ecology*, **25**, 166–176.
- 473 Stanton, M.L. (1984) Seed variation in wild radish: effect of seed size on components of seedling  
474 and adult fitness. *Ecology*, **65**, 1105–1112.
- 475 Stratton, D.A. (1989) Competition prolongs expression of maternal effects in seedlings of  
476 *Erigeron annuus* (Asteraceae). *American Journal of Botany*, **76**, 1646.
- 477 Strauss, S.Y., Webb, C.O. & Salamin, N. (2006) Exotic taxa less related to native species are  
478 more invasive. *Proceedings of the National Academy of Sciences*, **103**, 5841–5845.
- 479 Sultan, S.E., Barton, K. & Wilczek, A.M. (2009) Contrasting patterns of transgenerational  
480 plasticity in ecologically distinct congeners. *Ecology*, **90**, 1831–1839.
- 481 Susko, D.J. & Cavers, P.B. (2008) Seed size effects and competitive ability *Thlaspi arvense* L.  
482 (Brassicaceae). *Botany*, **86**, 259–267.
- 483 Uller, T., Nakagawa, S. & English, S. (2013) Weak evidence for anticipatory parental effects in  
484 plants and animals. *Journal of Evolutionary Biology*, **26**, 2161–2170.

- 485 Van Allen, B.G. & Rudolf, V.H.W. (2013) Ghosts of habitats past: environmental carry-over  
486 effects drive population dynamics in novel habitat. *The American Naturalist*, **181**, 596–608.
- 487 Van Allen, B.G. & Rudolf, V.H.W. (2015) Habitat-mediated carry-over effects lead to context-  
488 dependent outcomes of species interactions. *Journal of Animal Ecology*, **84**, 1646–1656.
- 489 Van Allen, B.G. & Rudolf, V.H.W. (2016) Carryover effects drive competitive dominance in  
490 spatially structured environments. *Proceedings of the National Academy of Sciences*, **113**,  
491 6939–6944.
- 492 Weiner, J., Martinez, S., Muller-Scharer, H., Stoll, P. & Schmid, B. (1997) How important are  
493 environmental maternal effects in plants? A study with *Centaurea maculosa*. *The Journal of*  
494 *Ecology*, **85**, 133–142.
- 495 Westoby, M., Leishman, M., Lord, J., Poorter, H. & Schoen, D.J. (1996) Comparative ecology of  
496 seed size and dispersal. *Philosophical Transactions of the Royal Society B: Biological*  
497 *Sciences*, **351**, 1309–1318.
- 498 Zuur, A., Ieno, E.N., Walker, N., Saveliev, A.A. & Smith, G.M. (2009) *Mixed Effects Models*  
499 *and Extensions in Ecology with R*. Springer.
- 500
- 501
- 502
- 503
- 504

505

## Figures

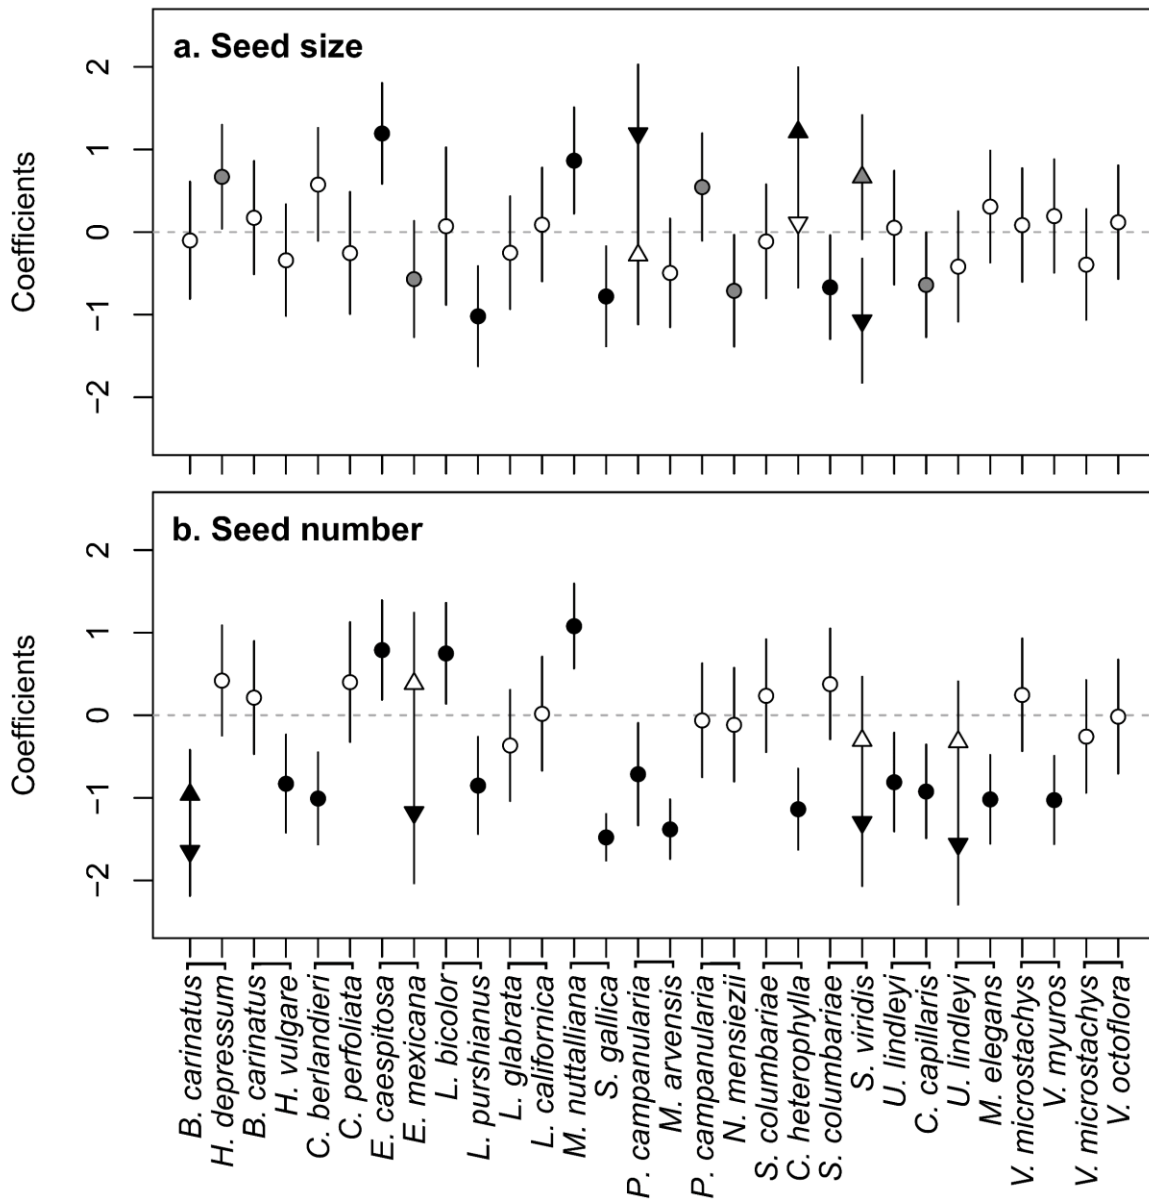

506

507 **Fig. 1.** Cross-species comparison of frequency-dependent (a) maternal provisioning of seed mass

508 and (b) seed number responses. Points are slope coefficients ( $\pm 2 \times$  standard error) of species

509 responses to the frequency of conspecific competitors, and are shaded black, gray, or white to

510 indicate significant ( $P < 0.05$ ), marginally-significant ( $P < 0.10$ ), or non-significant ( $P > 0.10$ )

511 slopes, respectively. In most cases, frequency  $\times$  soil moisture interactions are non-significant,



512 and slopes are averaged across soil moisture environments; when significant, wet (upwards  
513 triangle) and dry (downwards triangle) environments are plotted separately. Competitive pairs  
514 are delineated by lines connecting species name abbreviations (first letter of genus and species  
515 name). See Table S1 for taxonomic and collection information.

516

517

518

519

520

521

522

523

524

525

526

527

528

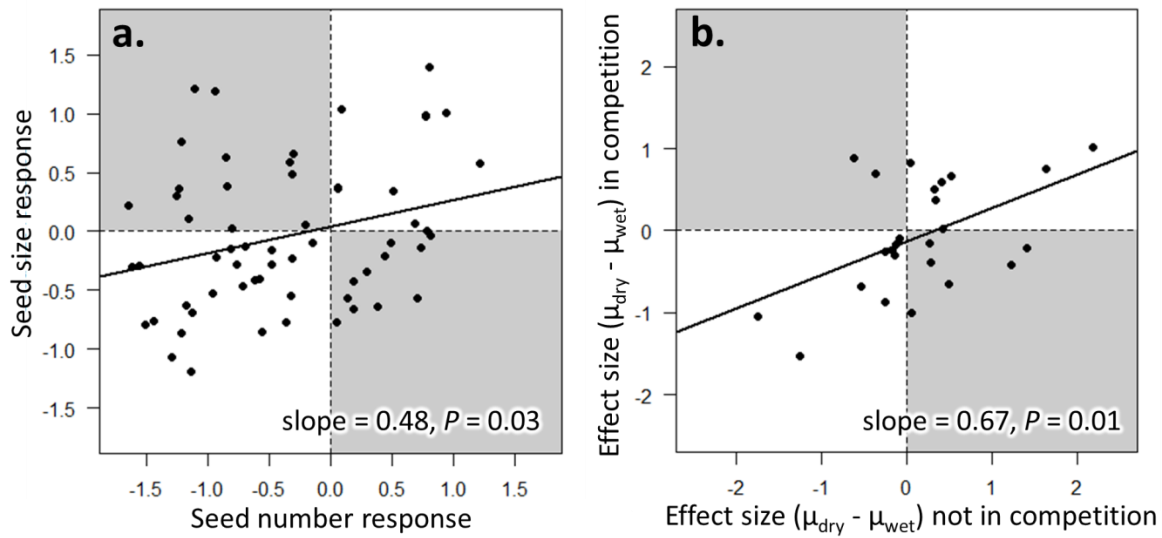

529

530 **Fig. 2.** Correlations of (a) seed mass and seed number responses to conspecific frequency ( $n = 60$

531 [15 pairs  $\times$  two species  $\times$  two soil moisture environments]), and (b) seed mass responses to soil

532 moisture conditions in the presence and absence of competition ( $n = 25$ ). Each point is a species,

533 and points that fall in the grey zones are species with opposing directions of responses.

534

535

536

537

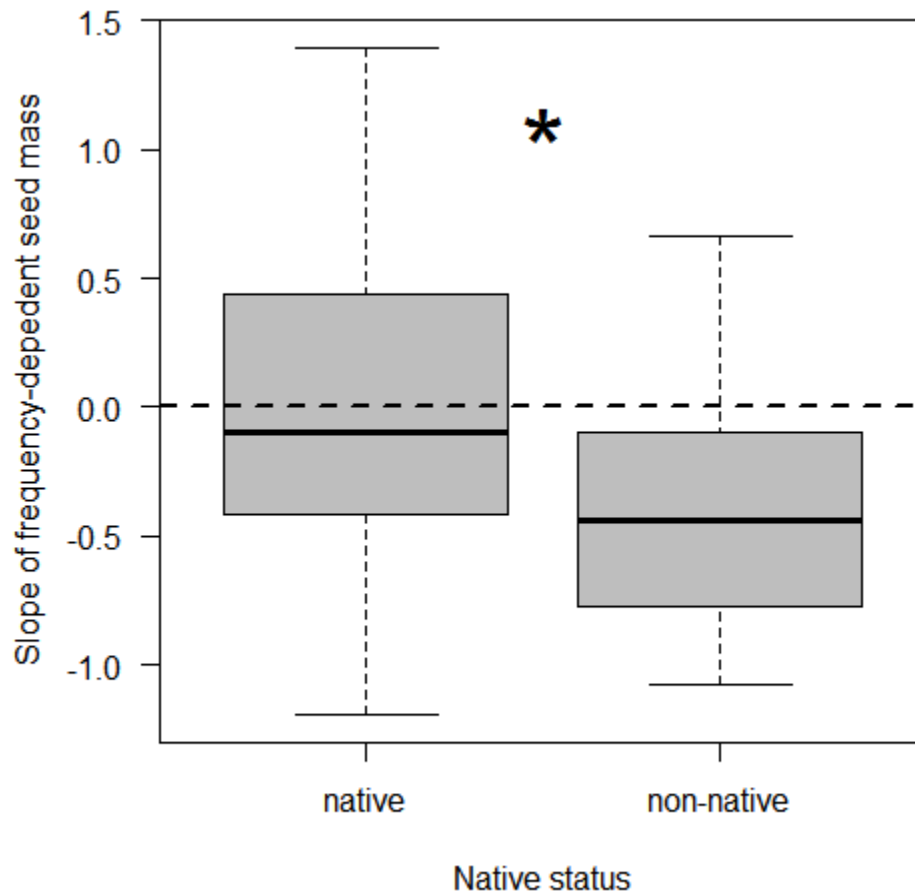

538

539 **Fig. 3.** A comparison of frequency-dependent seed mass among native ( $n = 19$ ) and non-native  
540 ( $n = 6$ ) species. The dashed horizontal line indicates a slope of 0, and the asterisk indicates a  
541 significant difference ( $P = 0.03$ ). See Supplementary Methods for details of the analysis.
